# Supplementary material for: Design and fabrication of polydopamine based superhydrophobic fabrics for efficient oil–water separation
Source: Royal Society of Chemistry journal article supplement (doi:10.1039/d1sm00647a), 2021-01-01
Supplement: d1sm00647a3.pdf [file d1sm00647a3.pdf]

## Supporting Information

### **Design and fabrication of polydopamine based superhydrophobic fabrics for efficient oil-water separation**

Jixi Zhang <sup>a</sup>, Ligui Zhang <sup>a</sup>, Xiao Gong\*<sup>a</sup>

a. State Key Laboratory of Silicate Materials for Architectures, Wuhan  
University of Technology, Wuhan 430070, P. R. China.

\* Corresponding author:

**E-mail address:** [xgong@whut.edu.cn](mailto:xgong@whut.edu.cn) (X. Gong)

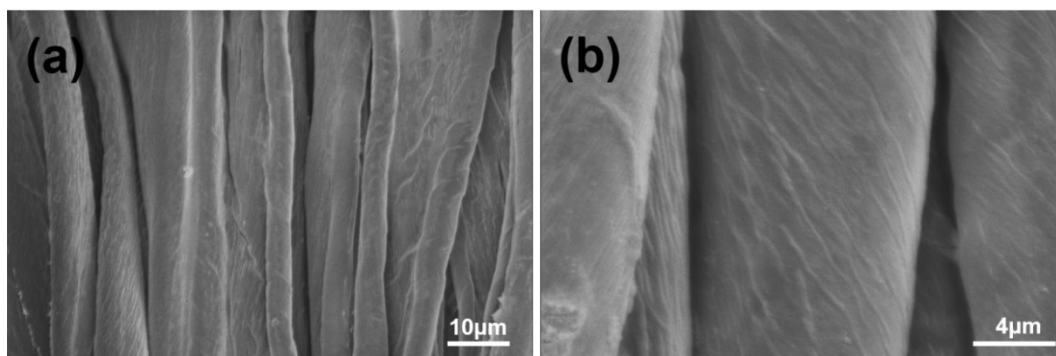

Fig. S1. The SEM images of SiO<sub>2</sub>@fabric.

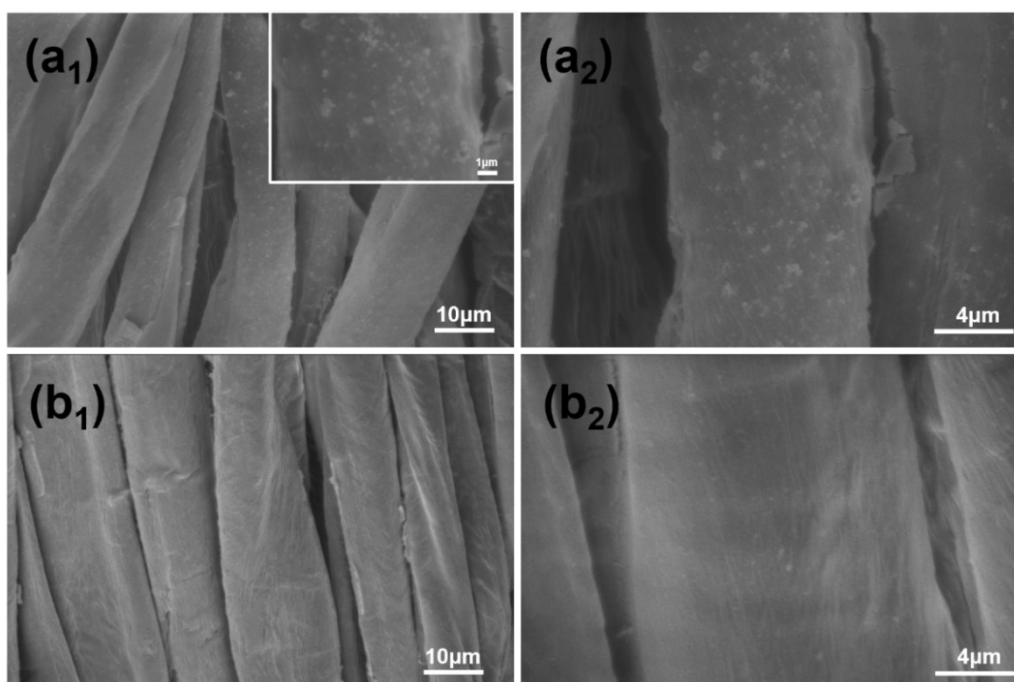

Fig. S2. The SEM images of (a<sub>1</sub>, a<sub>2</sub>) SiO<sub>2</sub>-PDA@fabric and (b<sub>1</sub>, b<sub>2</sub>) SiO<sub>2</sub>@fabric after ultrasonic treatment.

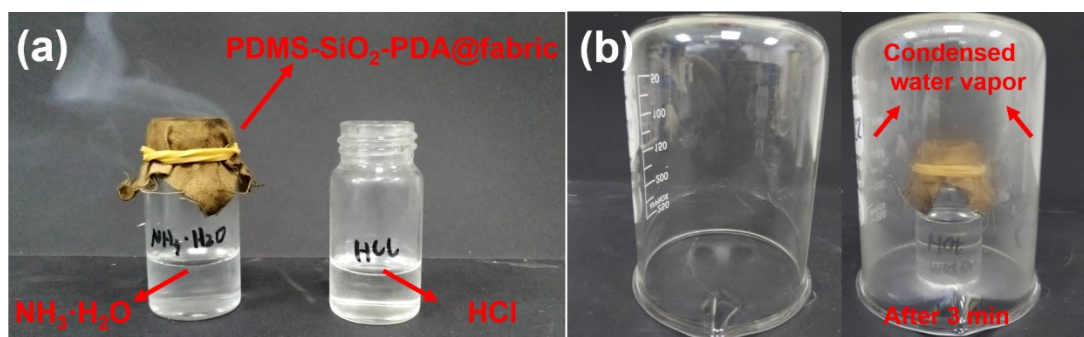

Fig. S3. Optical photographs of (a) ammonia gas and (b) water vapor permeability of PDMS-SiO<sub>2</sub>-PDA@fabric.
